# Supplementary material for: Mind the gap: forest soils as a hidden hub for global micro- and nanoplastic pollution
Source: Springer Nature journal article supplement (doi:10.1186/s43591-023-00067-1), 2023-08-31
Supplement: MOESM1 [file 43591_2023_67_MOESM1_ESM.docx]

**Supplementary Material**

**Mind the gap: Forest soils as a hidden hub for global micro- and nanoplastic pollution**

Collin J. Weber1*, Matthias C. Rillig2, Moritz Bigalke1

**1**Soil Mineralogy and Soil Chemistry, Institute of Applied Geosciences, Technical University Darmstadt, Germany

2 Institute of Biology, Freie Universität Berlin, Germany

***** Corresponding author: Collin J. Weber, [collin.weber@tu-darmstadt.de](mailto:collin.weber@tu-darmstadt.de)

**Content:**

Table S1 Details on microplastic extraction method and analytical approaches from studies conducted in forest areas.

**Table S1.** Details on microplastic extraction method and analytical approaches from studies conducted in forest areas.

| **Ref** | **Publication** | **Target environmental matrix** | **Targeted MNP size range** | **Major extraction methoda** | **Analytical methodb** |
| --- | --- | --- | --- | --- | --- |
| 26 | Choi et al. (2021) | Forest soils  (8 sites out of 100 sampled within the study)  Republic of Korea | 0.45 - 5000 µm (no size detection limit given) | ZnCl2 density separation (1.7 g cm-3) via stirring (300 rpm) and settling (24h) followed by organic matter digestion | Optical microscopy and FTIR analysis of selected samples |
| 27 | Xu et al. (2022) | Forest soils  (8 sites of primary and secondary tropical forest)  China | 5-5000 µm  (no size detection limit given) | ZnCl2 density separation (1.6 g cm-3) via stirring and settling overnight followed by organic matter digestion | Optical microscopy and µFTIR |
| 39 | Materic et al. (2022) | Lake and stream water  in remote forest areas  Sweden / Siberia | >0.45 or >0.7 µm depending on sampling site | Only filtration | Desorption  proton transfer-reaction mass spectrometry (TD-PTR-MS) |
| 44 | Klein & Fischer (2019) | Atmospheric deposition  in beach/oak and douglas fir forest  Germany | 50-5000 µm | Nile Red staining | Fluorescence microscopy |
| 49 | Allen et al. (2019) | Atmospheric deposition in remote maintain forest  France | 5-5000 µm  (no size detection limit given) | ZnCl2 density separation (1.6 g cm-3) followed by organic matter digestion | Optical microscopy and µRaman |
| 50 | Leonard et al. (2023) | Tree leaves  from five tree species urban environment (and soils)  United States | >20 µm | Leave washing with deionized water and Nile Red staining | µFTIR |
| ***a*** *Details on sample pre-treatment and sample purification are not stated;* ***b*** *Details on spectroscopic analysis or image analysis are not stated* | | | | | |
